# Supplementary material for: Fabrication of mm-Scale Complementary Split Ring Resonators, for Potential Application as Water Pollution Sensors
Source: MDPI journal article supplement (doi:10.3390/ma16155290), 2023-07-27
Supplement: s1 [file s1]

# Fabrication of mm-scale complementary split ring resonators, for potential application as water pollution sensors

Zacharias Viskadourakis, George Fanourakis, Evangelos Tamiolakis, Anna Theodosi, Klytaimnistra Katsara, Nikolaos Rafael Vrithias, Odysseas Tsilipakos and George Kenanakis

## Supplementary Material

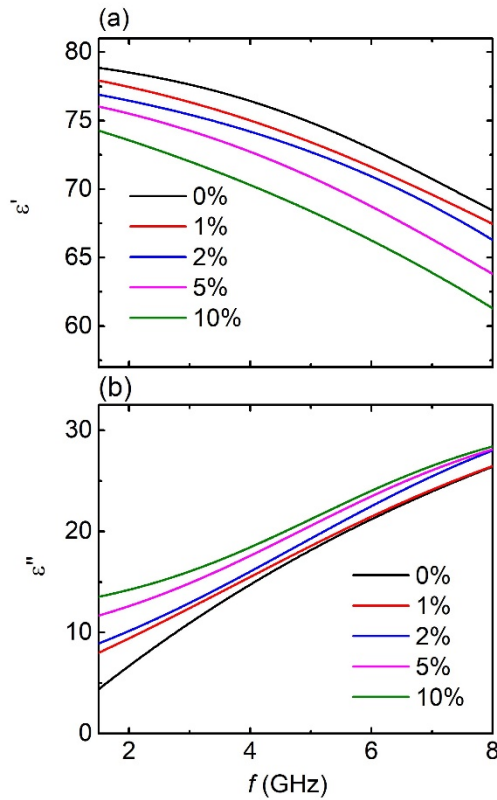

**Figure S1: Dielectric permittivity vs. frequency for aqueous solutions containing fertilizer, in various concentrations, i.e., 10% wt. (green line), 5% wt. (magenta line), 2% wt. (blue line), 1% wt. (red line) and 0% (black line – pure water). (a) real part and (b) imaginary part.** Dielectric permittivity has been measured using the N1501A Dielectric Probe Kit (Keysight, California, USA), in combination with the N1500A Materials Measurement Suite (Keysight, California, USA), for data analysis.

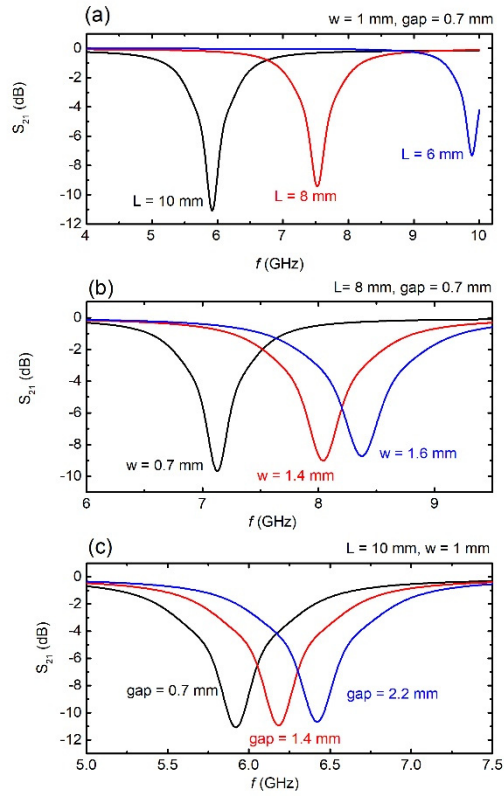

**Figure S2:  $S_{21}$  vs.  $f$  curves, for rectangular complementary split ring resonators, as determined from theoretical simulations. (a) Length dependence (b) line width dependence (c) gap dependence**

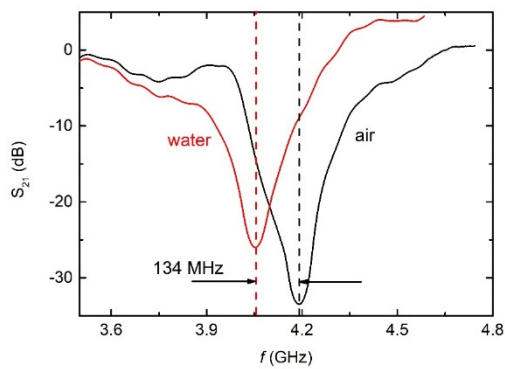

**Figure S3:  $S_{21}$  vs.  $f$ , for the C1 sample with (red solid line) and without (black solid line) the presence of water into the engraved area.**

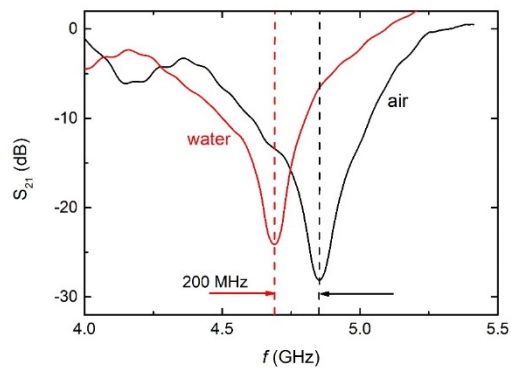

**Figure S4:**  $S_{21}$  vs.  $f$ , for the C3 sample with (red solid line) and without (black solid line) the presence of water into the engraved area.

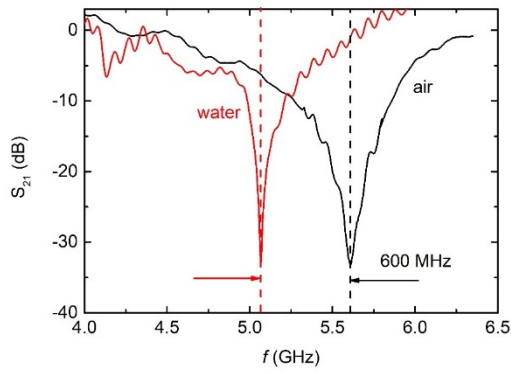

**Figure S5:**  $S_{21}$  vs.  $f$ , for the C4 sample with (red solid line) and without (black solid line) the presence of water into the engraved area.

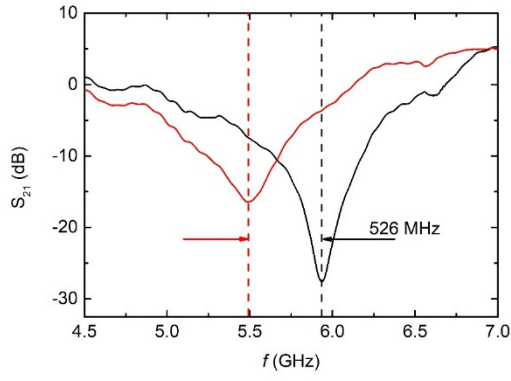

**Figure S6:  $S_{21}$  vs.  $f$ , for the C6 sample with (red solid line) and without (black solid line) the presence of water into the engraved area.**

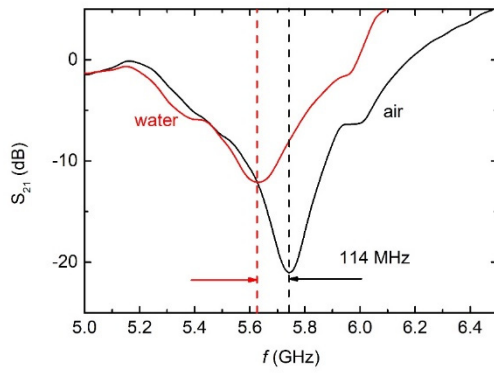

**Figure S7:  $S_{21}$  vs.  $f$ , for the C10 sample with (red solid line) and without (black solid line) the presence of water into the engraved area.**

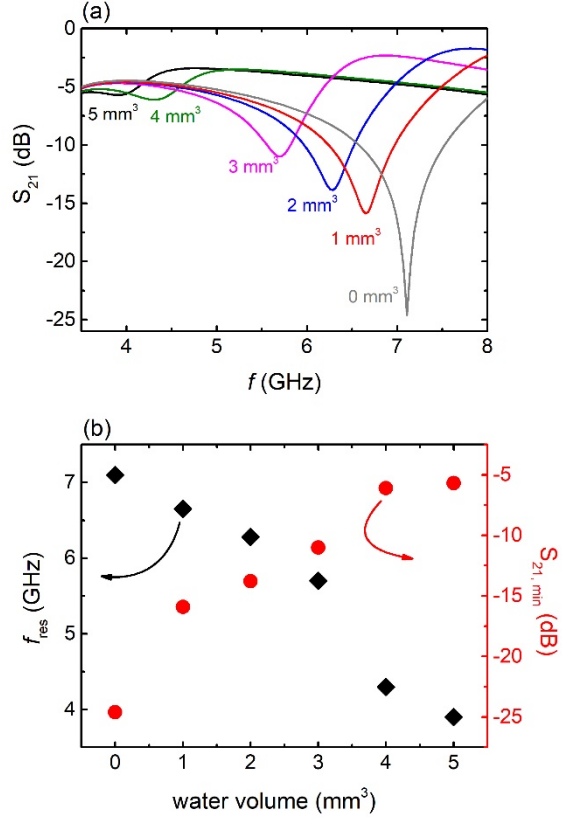

**Figure S8: Theoretical simulations, regarding the injection of various water quantities into the engraved area of the CSRR. Dimension of the CSRR:  $L=7\text{mm}$ ,  $w=1\text{mm}$ ,  $\text{gap}=1.2\text{mm}$ , engraved depth =  $0.2\text{mm}$ . The metal coating is  $35\text{ }\mu\text{m}$ . (a)  $S_{21}$  vs  $f$  curves (b) Resonance frequency vs. water volume (black symbols) and intensity vs. water volume (red symbols), as extracted from panel (a).**

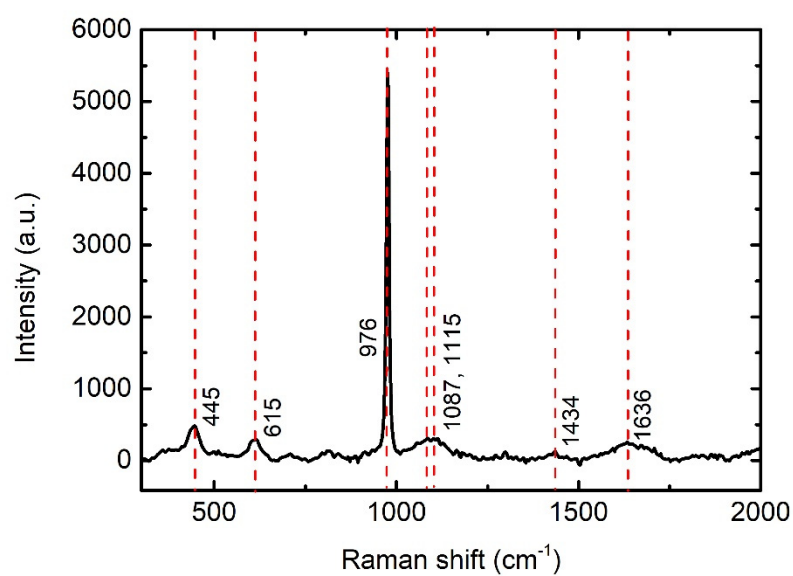

**Figure S9: Raman spectrum of the ammonium sulphate  $[(\text{NH}_4)_2\text{SO}_4]$ , the main ingredient of the fertilizer used in aqueous solutions, studied in the main text. All peaks observed can be ascribed to the intra-molecular vibrations of the ammonium sulphate. .**

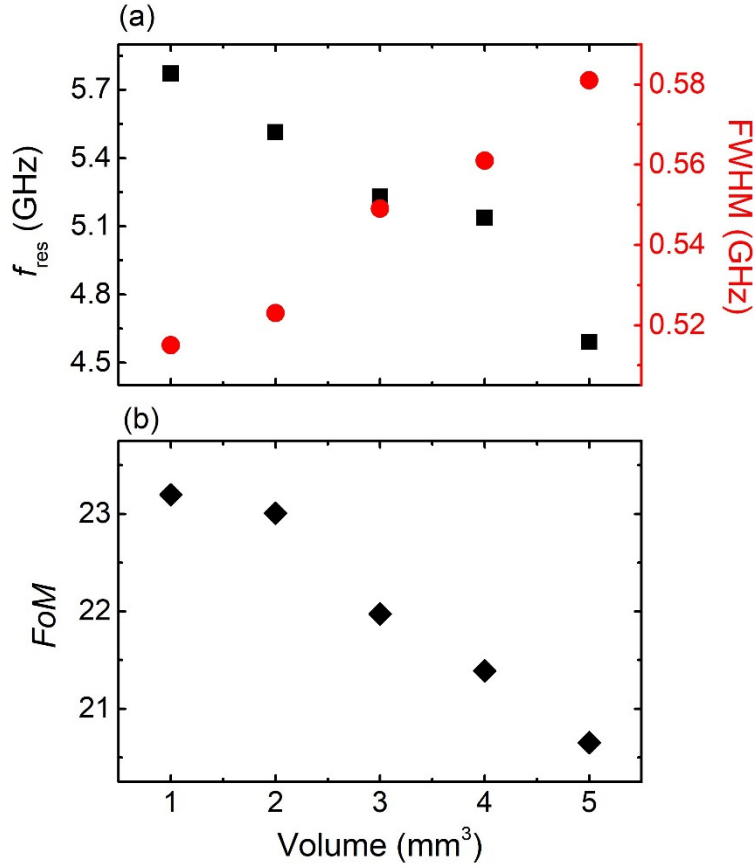

**Figure S10: (a). Resonance frequency (black rectangles), and corresponding FWHM (red circles), as a function of water volume. Data are extracted from Fig. 4a of the main text (b). Calculated FoM as a function of volume. A clear lope change is observed above  $\sim 2\text{mm}^3$ , suggesting the inferior performance of the MS, above such limit.**

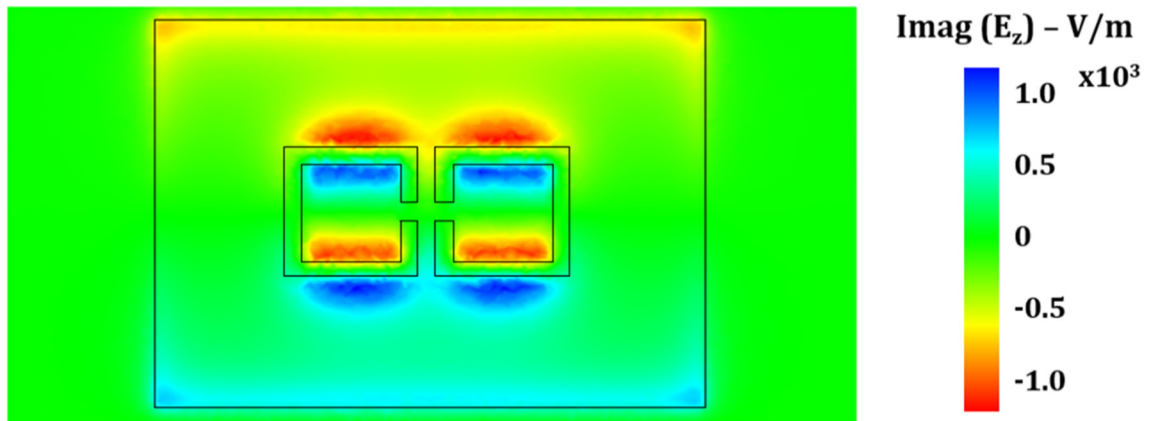

**Figure S11: Electric field distribution (imaginary part of  $E_z$  component) at the resonance frequency of 7.05GHz without the presence of water. Dimensions of the CSRR:  $L=7\text{mm}$ ,  $w=1\text{mm}$ ,  $\text{gap}=1.2\text{mm}$ , engraved depth= $0.2\text{mm}$ . The metal coating is  $35\mu\text{m}$ .**

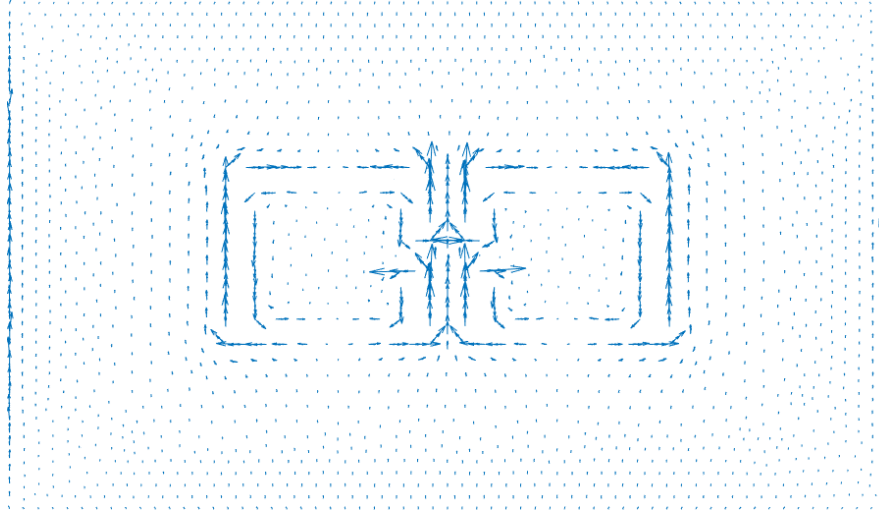

**Figure S12: Current density distribution ( $J_x$  and  $J_y$  components) at the resonance frequency of 7.05GHz without the presence of water.** Dimensions of the CSRR:  $L=7\text{mm}$ ,  $w=1\text{mm}$ ,  $\text{gap}=1.2\text{mm}$ , engraved depth= $0.2\text{mm}$ . The metal coating is  $35\mu\text{m}$ .
